# Supplementary material
Source: HighWire-hosted journal article supplement (https://bmjopen.bmj.com/content/7/9/e016964)
Supplement: inline-supplementary-material-2 [file inline-supplementary-material-2.pdf]

## Acne

The following questions are only for those who suffer from acne currently

5. If you answered yes to having acne currently, do you feel you have mild, moderate or severe acne?

“We used photos from DermNet, but these have been removed for anonymity”.

6. At what age did you first get acne (more than just a spot or two)?

11

**7. Have you ever sought help for your acne apart from your family?**

**(you can choose more than one answer)**

- No - I just had help from my family
- Yes - from the pharmacist (chemist)
- Yes - from a doctor

**8. If you saw a doctor, who did you see?**

**(you can choose more than one answer)**

- Your GP or family doctor
- A Paediatrician
- A Dermatologist
- Don't know

**9. If you didn't seek help for your acne, can you tell us why you didn't want to seek help?**

**(you can choose more than one answer)**

- Too embarrassed
- Too busy
- Felt doctor would be unapproachable
- Other (please explain)

We'd now like you to answer some questions about how having acne has affected you **in the last month**. Remember this refers to the last month before you did this survey.

Please just give one response for each question.

**10. As a result of having acne, during the last month have you been aggressive, frustrated or embarrassed?**

- Very much indeed
- A lot
- A little
- Not at all

**11. Do you think that having acne **during the last month** interfered with your daily social life, social events or relationships with other young people?**

- Severely, affecting all of my activities
- Moderately, affecting most of my activities
- Occasionally or only affecting some of my activities
- Not at all
